# Supplementary material for: Venetoclax Increases Intratumoral Effector T Cells and Antitumor Efficacy in Combination with Immune Checkpoint Blockade
Source: Oxford University Press journal article supplement (doi:10.1158/2159-8290.cd-19-0759), 2020-09-04
Supplement: 21598290cd190759-sup-224937_2_supp_6508945_qfmmz0.docx [file 21598290cd190759-sup-224937_2_supp_6508945_qfmmz0.docx]

**Supplementary Table 1. Antibodies used for flow cytometry**

| **Antibody** | **Vendor** | **Clone** |
| --- | --- | --- |
| **Anti-Human antibodies used in PBMCs assays:** | |  |
| CD3 | BD Biosciences | SK7 |
| CD4 | BD Biosciences | RPA-T4 |
| CD8 | BD Biosciences | SK1 |
| CD45RA | Biolegend | HI100 |
| CCR7 | eBioscience | 3D12 |
| CD19 | Biolegend | HIB19 |
| CD62L | BD Biosciences | DREG-56 |
| BCL-2 | BD Biosciences | Bcl-2/100 |
| BCL-XL | Cell Signaling | 54H6 |
|  |  |  |
| **Anti-Human antibodies used in MLR & CMV assays:** | |  |
| CD3 | Biolegend | OKT3 |
| CD4 | Biolegend | RPA-T4 |
| CD8 | Biolegend | SK1 |
| IFNγ | Biolegend | 4S.B3 |
|  |  |  |
| **Anti-Mouse antibodies used in *in vivo* studies:** | |  |
| CD45 | BioLegend | 30-F11 |
| CD4 | BioLegend | GK1.5 |
| CD8a | BD Biosciences | 53-6.7 |
| CD62L | BD Biosciences | MEL-14 |
| CD44 | BioLegend | IM7 |
| CD19 | BioLegend | 6D5 |
| CD279 (PD-1) | BioLegend | 29F.1A12 |
| CD274 (PD-L1) | BD Biosciences | MIH5 |
| KLRG1 | BioLegend | MAFA |
| CD127 | BioLegend | A7R34 |
| Bcl-2 | BioLegend | BCL/10C4 |
| Bcl-xL | Cell Signaling Technologies | 54H6 |
| CD90.2 (Thy1.2) | BioLegend | 53-2.1 |
| CD11b | BD Biosciences | M1/70 |
| F4/80 | BioLegend | BM8 |
